# Supplementary material for: Effect of antibiotic stewardship interventions in primary care on antimicrobial resistance of Escherichia coli bacteraemia in England (2013–18): a quasi-experimental, ecological, data linkage study
Source: PubMed Central journal article supplement — Lancet Infect Dis. 2021 Dec;21(12):1689–700. doi: 10.1016/S1473-3099(21)00069-4 (PMC8612938; doi:10.1016/s1473-3099(21)00069-4), 2021-12
Supplement: mmc1.pdf [file mmc1.pdf]

# THE LANCET

## Infectious Diseases

### Supplementary appendix

This appendix formed part of the original submission and has been peer reviewed. We post it as supplied by the authors.

Supplement to: Aliabadi S, Anyanwu P, Beech E, et al. Effect of antibiotic stewardship interventions in primary care on antimicrobial resistance of *Escherichia coli* bacteraemia in England (2013–18): a quasi-experimental, ecological, data linkage study. *Lancet Infect Dis* 2021; published online August 4. [https://doi.org/10.1016/S1473-3099\(21\)00069-4](https://doi.org/10.1016/S1473-3099(21)00069-4).

**Do Antibiotic Stewardship Interventions in Primary Care Have an Effect on Antimicrobial Resistance of *Escherichia coli* Bacteraemia in England? An Ecological Analysis of National Data Between 2013-2018**

**Supplementary Material**

**Supplementary Table 1. GP practice antibiotic prescribing for community-onset *E. coli* bacteraemia isolates**

|                          | Mean number of items<br>period before implementation of QP<br>(Jan. 2013 to Mar. 2015, 27 months)<br>(n = 6,882 <sup>1</sup> ) |        |                 |                 | Mean number of items<br>period after implementation of QP<br>(Apr. 2015 to Dec. 2018, 45 months)<br>(n = 6,882 <sup>1</sup> ) |        |                 |                 |
|--------------------------|--------------------------------------------------------------------------------------------------------------------------------|--------|-----------------|-----------------|-------------------------------------------------------------------------------------------------------------------------------|--------|-----------------|-----------------|
|                          | Mean                                                                                                                           | SD     | Lower 95%<br>CI | Upper 95%<br>CI | Mean                                                                                                                          | SD     | Lower 95%<br>CI | Upper 95%<br>CI |
| <b>Ciprofloxacin</b>     | 51.04                                                                                                                          | 58.66  | 49.65           | 524.2           | 59.47                                                                                                                         | 63.83  | 57.96           | 60.98           |
| <b>Co-Amoxiclav</b>      | 364.50                                                                                                                         | 333.32 | 356.62          | 372.38          | 517.25                                                                                                                        | 436.23 | 506.94          | 527.56          |
| <b>Levofloxacin</b>      | 3.78                                                                                                                           | 12.83  | 3.47            | 4.08            | 8.21                                                                                                                          | 25.21  | 76.2            | 8.81            |
| <b>Moxifloxacin</b>      | 1.63                                                                                                                           | 5.62   | 150             | 1.76            | 2.72                                                                                                                          | 8.72   | 2.52            | 2.93            |
| <b>Ofloxacin</b>         | 2.63                                                                                                                           | 6.25   | 249             | 2.78            | 6.31                                                                                                                          | 11.41  | 6.05            | 6.58            |
| <b>Total Antibiotics</b> | 423.58                                                                                                                         | 364.19 | 4149.7          | 432.18          | 593.97                                                                                                                        | 483.84 | 582.54          | 605.40          |

Abbreviations: CI = Confidence Interval, SD = standard deviation

<sup>1</sup> Number of GP practices included in study as the denominator

**Supplementary Table 2. Characteristics of patients with community-onset *E. coli* bacteraemia between 2013-2018**

|                                                         |                               | Total<br>(138,787) |       | Susceptible <sup>3</sup> isolates<br>(84,078) |       | Resistant <sup>3</sup> isolates<br>(54,709) |       |
|---------------------------------------------------------|-------------------------------|--------------------|-------|-----------------------------------------------|-------|---------------------------------------------|-------|
|                                                         |                               | n                  | %     | n                                             | %     | n                                           | %     |
| <b>Gender<sup>1</sup></b>                               | <b>Male</b>                   | 64,229             | 46·28 | 37,782                                        | 58·82 | 26,447                                      | 41·18 |
|                                                         | <b>Female</b>                 | 74,519             | 53·69 | 46,272                                        | 62·09 | 28,247                                      | 37·91 |
| <b>Patient age groups<br/>(in years)</b>                | <b>0 – 14</b>                 | 2227               | 16·0  | 1584                                          | 71·13 | 643                                         | 28·87 |
|                                                         | <b>15 – 24</b>                | 2647               | 19·1  | 1893                                          | 71·51 | 754                                         | 28·49 |
|                                                         | <b>25 – 64</b>                | 33,248             | 23·96 | 20,974                                        | 63·08 | 12,274                                      | 36·92 |
|                                                         | <b>65+</b>                    | 100,665            | 72·53 | 59,627                                        | 59·23 | 41,038                                      | 40·77 |
| <b>Region</b>                                           | <b>London</b>                 | 18,839             | 13·57 | 11,465                                        | 60·86 | 7374                                        | 39·14 |
|                                                         | <b>Southeast</b>              | 21,606             | 155·7 | 13,202                                        | 61·10 | 8404                                        | 38·90 |
|                                                         | <b>Southwest</b>              | 14,136             | 10·19 | 8716                                          | 61·66 | 5420                                        | 38·34 |
|                                                         | <b>West Midlands</b>          | 16,031             | 11·55 | 10,584                                        | 66·02 | 5447                                        | 33·98 |
|                                                         | <b>East Midlands</b>          | 12,144             | 8·75  | 6655                                          | 54·80 | 5489                                        | 45·20 |
|                                                         | <b>East of England</b>        | 15,596             | 11·24 | 8226                                          | 52·74 | 7370                                        | 47·26 |
|                                                         | <b>Northeast</b>              | 9068               | 6·53  | 6122                                          | 67·51 | 2946                                        | 32·49 |
|                                                         | <b>Yorkshire &amp; Humber</b> | 12,757             | 9·19  | 8212                                          | 64·37 | 4545                                        | 35·63 |
| <b>Tests against individual antibiotics<sup>2</sup></b> | <b>Northwest</b>              | 18,610             | 13·41 | 10,896                                        | 58·55 | 7714                                        | 41·45 |
|                                                         | <b>Ciprofloxacin</b>          | 119,095            | 85·81 | 98,528                                        | 82·73 | 20,567                                      | 17·27 |
|                                                         | <b>Co-Amoxiclav</b>           | 119,140            | 85·84 | 71,968                                        | 60·41 | 47,172                                      | 39·59 |
|                                                         | <b>Levofloxacin</b>           | 9386               | 6·76  | 7635                                          | 81·34 | 1751                                        | 18·66 |
|                                                         | <b>Moxifloxacin</b>           | 2012               | 1·45  | 1392                                          | 69·18 | 620                                         | 30·82 |
|                                                         | <b>Ofloxacin</b>              | 112                | 0·08  | 10                                            | 8·93  | 102                                         | 91·07 |

<sup>1</sup>Data were missing for 39 isolates

<sup>2</sup>Not all isolates were tested against each antibiotic during AST

<sup>3</sup>Against at least one of five broad spectrum antibiotics tested

All Antibiotics

Residual Plots

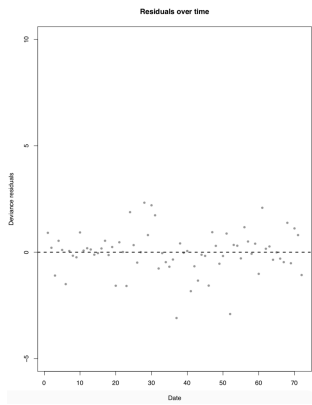

ACF Plots

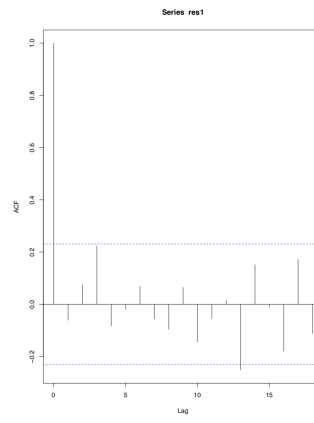

PACF Plots

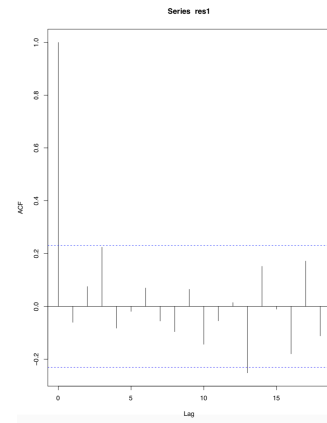

Ciprofloxacin

Residuals over time

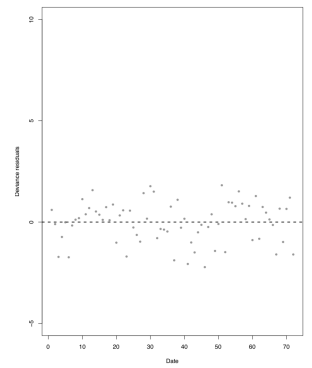

Series res1

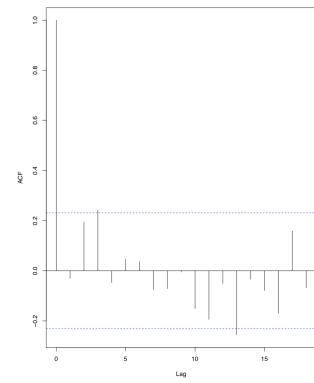

Series res1

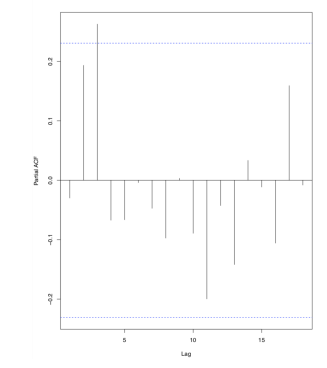

Co-amoxiclav

Residuals over time

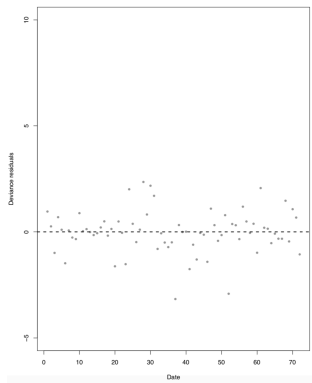

Series res1

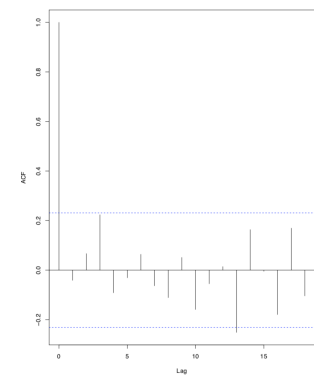

Series res1

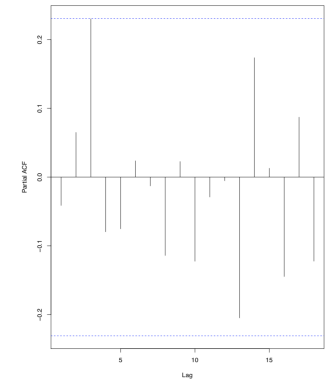

Moxifloxacin

Residuals over time

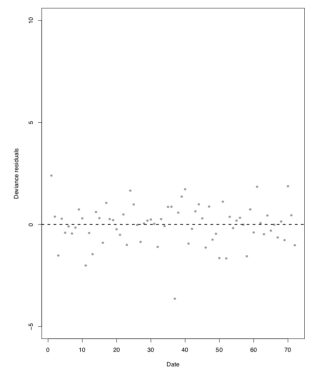

Series res1

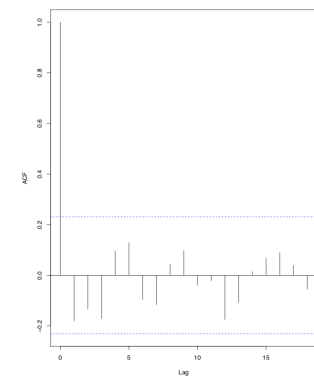

Series res1

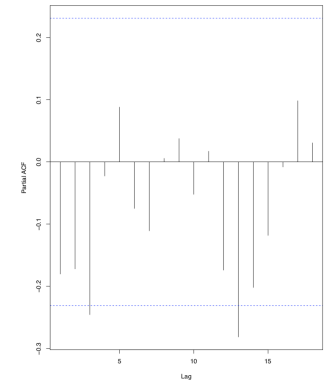

Ofloxacin

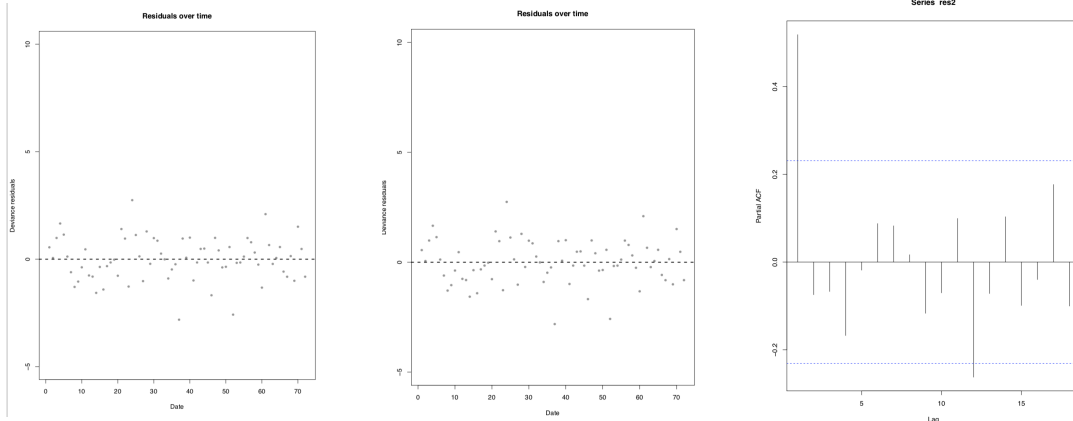

Levofloxacin

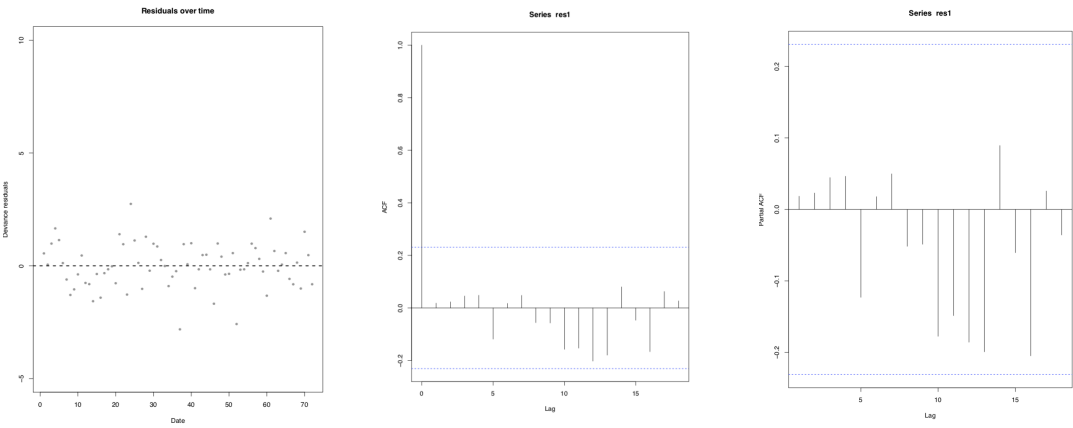

Ceftriaxone

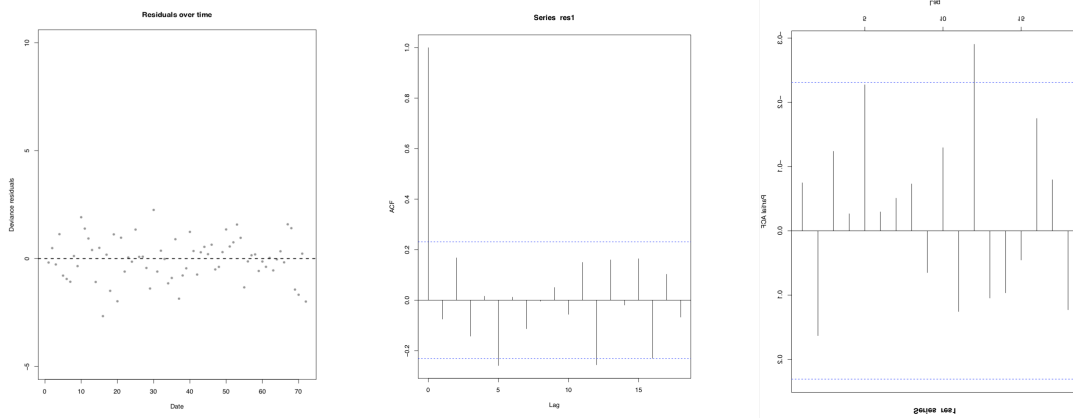

**Supplementary Figure 1. Residual, ACF and PACF plots for community antimicrobial exposure from 2013 to 2018 in England**

All Antibiotics

Residual Plots

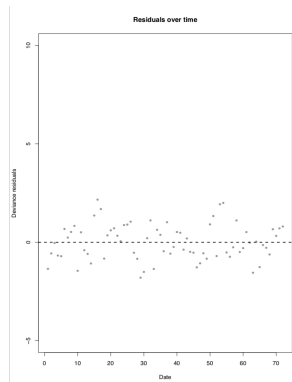

ACF Plots

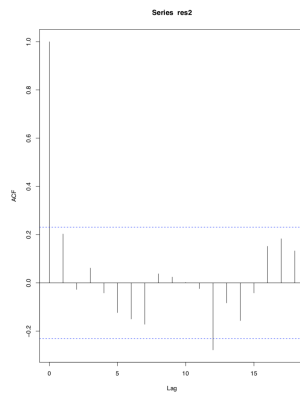

PACF Plots

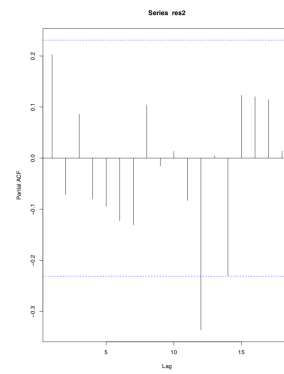

Ciprofloxacin

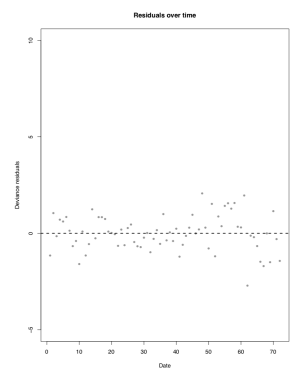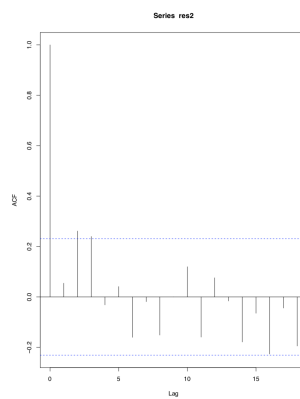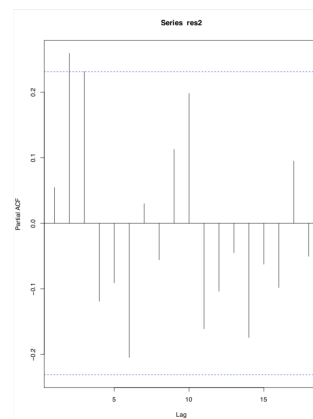

Co-amoxiclav

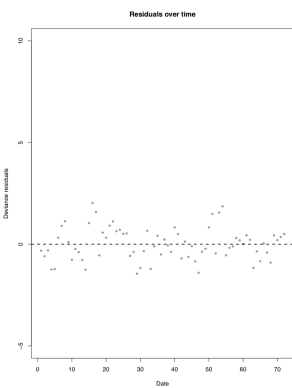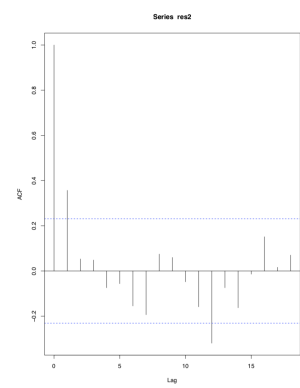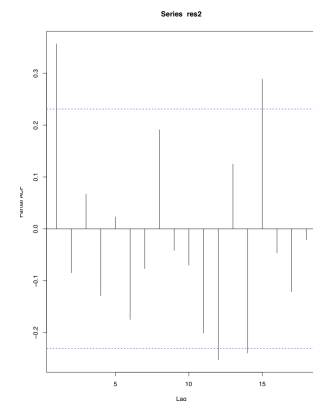

Moxifloxacin

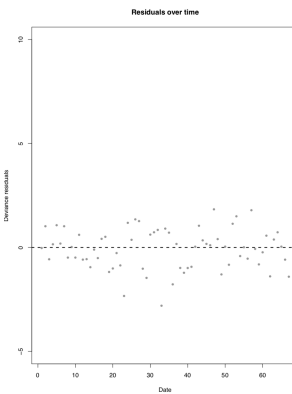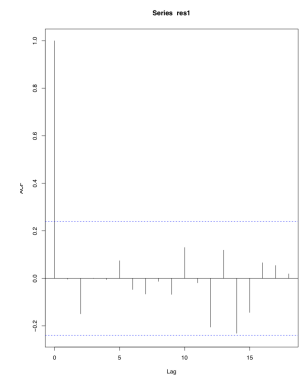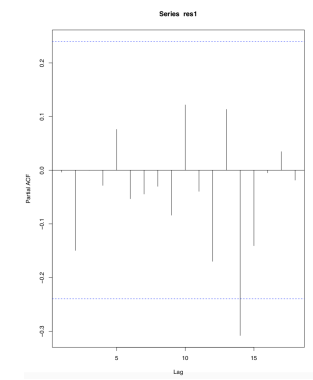

Ofloxacin

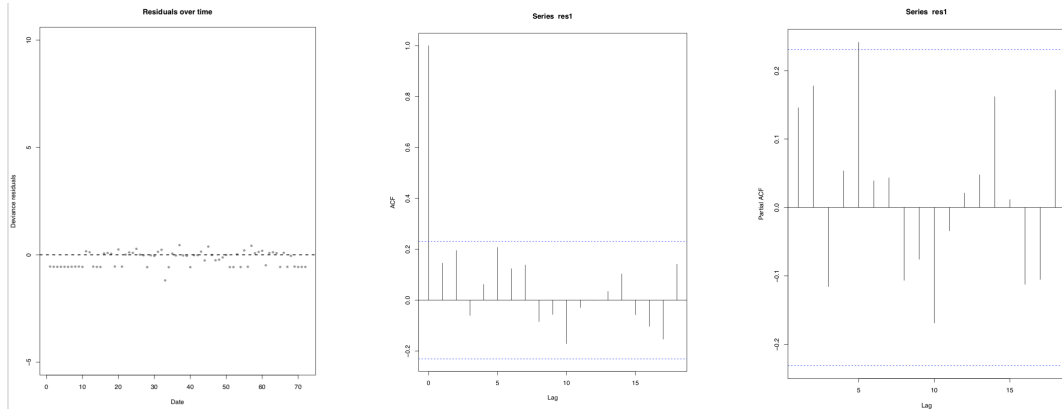

Levofloxacin

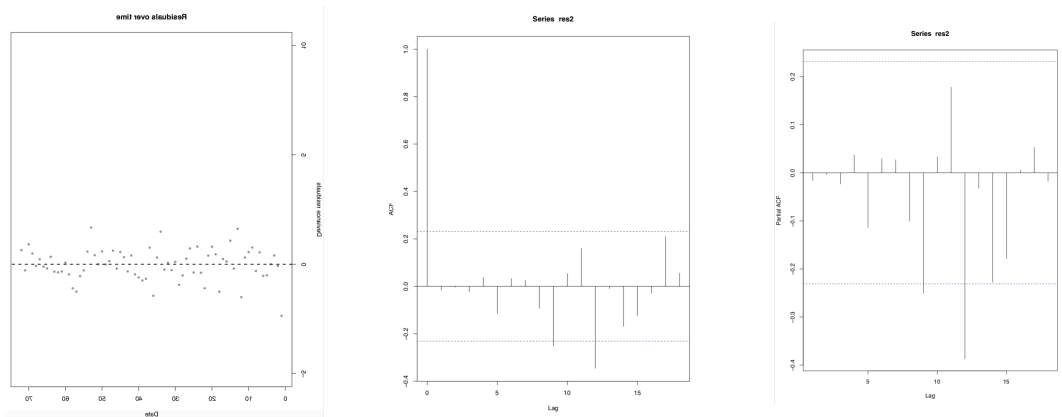

Ceftriaxone

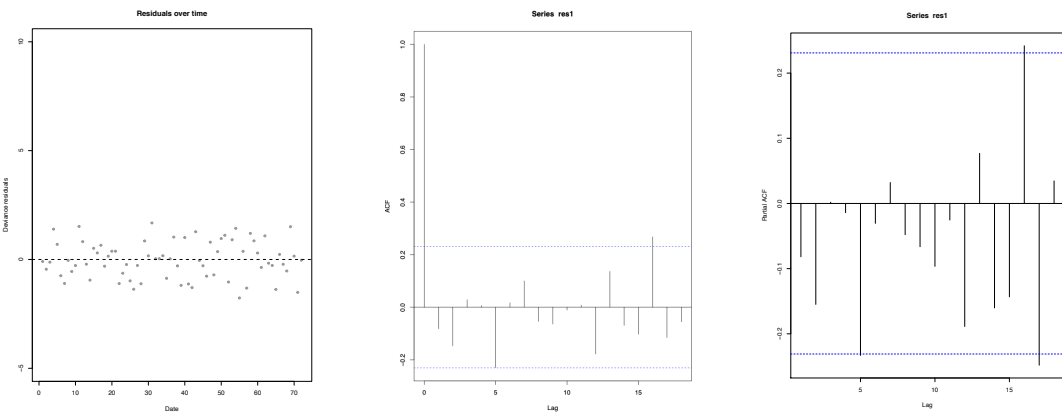

Supplementary Figure 2. Residual, ACF and PACF plots for GP practice level rates of resistance in *E. coli* community-onset bacteraemia isolates from 2013 to 2018 in England

**Supplementary Table 3. Interrupted time series analysis of changes in trends for antibiotic usage and antimicrobial resistance**

|                                             | Regression intercept      | Pre-intervention trend    | Immediate change after implementation of the QP | Change in trend over study period | Absolute effect | Relative effect (%) |
|---------------------------------------------|---------------------------|---------------------------|-------------------------------------------------|-----------------------------------|-----------------|---------------------|
| <b>Antibiotic Usage<sup>a</sup></b>         |                           |                           |                                                 |                                   |                 |                     |
| Ceftriaxone                                 | 0.000<br>(0.000 to 0.000) | 1.002<br>(0.996 to 1.008) | 0.929 (0.817 to 1.057)                          | 0.974<br>(0.967 to 0.981)         | 0.001           | -254.56             |
| <b>Antimicrobial Resistance<sup>b</sup></b> |                           |                           |                                                 |                                   |                 |                     |
| Ceftriaxone                                 | 0.094<br>(0.079 to 0.112) | 1.004<br>(0.998 to 1.011) | 1.043 (0.905 to 1.201)                          | 0.998<br>(0.990 to 1.006)         | 8.78            | 6.83                |

Confidence intervals shown in brackets  
<sup>a</sup> As a change in proportion of antibiotics prescribed per 1000 patients in GP practice  
<sup>b</sup> As a change in proportion of resistant isolates per 1000 isolates submitted to Public Health England



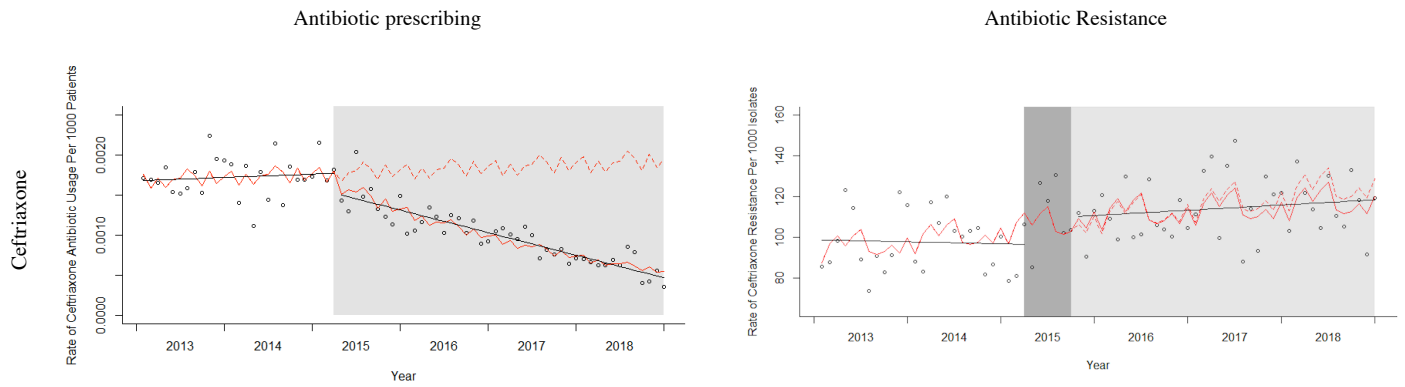

**Supplementary Figure 3. Rates of community ceftriaxone exposure from 2013 to 2018 and GP practice level rates of resistance in *E. coli* community-onset *E. coli* bacteraemia isolates tested against ceftriaxone in England in relation to the QP antimicrobial stewardship intervention implemented in 2015, with counterfactual (dotted line) and linear regression segments (black lines)**

**Supplementary Table 4. GP practice antibiotic prescribing for community-onset *E. coli* bacteraemia isolates with complete GP practice codes**

|                    | Antibiotics prescribed over entire study period<br>(Jan. 2013 to Dec. 2018)<br>(n = 6,866) |       |              |              | Antibiotics prescribed for 6-month period before implementation of QP<br>(Oct. 2014 to Mar. 2015, 6 months)<br>(n = 6,866) |      |              |              | Antibiotics prescribed for 6-month period after implementation of QP<br>(Apr. 2015 to Sep. 2015, 6 months)<br>(n = 6,866) |      |              |              |
|--------------------|--------------------------------------------------------------------------------------------|-------|--------------|--------------|----------------------------------------------------------------------------------------------------------------------------|------|--------------|--------------|---------------------------------------------------------------------------------------------------------------------------|------|--------------|--------------|
|                    | Mean                                                                                       | SD    | Lower 95% CI | Upper 95% CI | Mean                                                                                                                       | SD   | Lower 95% CI | Upper 95% CI | Mean                                                                                                                      | SD   | Lower 95% CI | Upper 95% CI |
| <b>Ceftriaxone</b> | 36.94                                                                                      | 10.02 | 36.71        | 37.18        | 3.11                                                                                                                       | 1.45 | 3.07         | 3.14         | 3.09                                                                                                                      | 0.86 | 3.07         | 3.11         |

**Abbreviations: CI = Confidence Interval, SD = standard deviation**

**Supplementary Table 5. Ceftriaxone resistance in *E. coli* causing community-onset *E. coli* bacteraemia between 2013-2018**

|                                                                                   |                    | Total<br>(138,576) |      | Susceptible <sup>3</sup> isolates<br>(83,940) |       | Resistant <sup>3</sup> isolates<br>(54,636) |       |
|-----------------------------------------------------------------------------------|--------------------|--------------------|------|-----------------------------------------------|-------|---------------------------------------------|-------|
|                                                                                   |                    | n                  | %    | n                                             | %     | n                                           | %     |
| <b>Tests against</b>                                                              |                    |                    |      |                                               |       |                                             |       |
| <b>individual</b>                                                                 | <b>Ceftriaxone</b> | 31,570             | 22.8 | 27,776                                        | 87.98 | 3794                                        | 12.02 |
| <b>antibiotics<sup>1</sup></b>                                                    |                    |                    |      |                                               |       |                                             |       |
| <b><sup>1</sup>Against at least one of five broad spectrum antibiotics tested</b> |                    |                    |      |                                               |       |                                             |       |

**Supplementary Table 6. GP practice antibiotic prescribing for community-onset *E. coli* bacteraemia isolates for isolates with complete GP practice codes**

|                          | Antibiotics prescribed over entire study period<br>(Jan. 2013 to Dec. 2018, 72 months)<br>(n = 6,866 <sup>1</sup> ) |        |                 |                 | Antibiotics prescribed for 6-month period before implementation of QP<br>(Oct. 2013 to Mar. 2015)<br>(n = 6,866 <sup>1</sup> ) |       |                 |                 | Antibiotics prescribed for 6-month period after implementation of QP<br>(Apr. 2015 to Sep. 2018)<br>(n = 6,866 <sup>1</sup> ) |       |                 |                 |
|--------------------------|---------------------------------------------------------------------------------------------------------------------|--------|-----------------|-----------------|--------------------------------------------------------------------------------------------------------------------------------|-------|-----------------|-----------------|-------------------------------------------------------------------------------------------------------------------------------|-------|-----------------|-----------------|
|                          | Mean                                                                                                                | SD     | Lower<br>95% CI | Upper<br>95% CI | Mean                                                                                                                           | SD    | Lower<br>95% CI | Upper<br>95% CI | Mean                                                                                                                          | SD    | Lower<br>95% CI | Upper<br>95% CI |
| <b>Ciprofloxacin</b>     | 110.90                                                                                                              | 116.58 | 108.14          | 113.67          | 10.83                                                                                                                          | 13.25 | 10.51           | 11.14           | 9.41                                                                                                                          | 11.35 | 9.14            | 9.68            |
| <b>Co-Amoxiclav</b>      | 883.93                                                                                                              | 738.04 | 866.44          | 901.42          | 86.74                                                                                                                          | 81.31 | 84.81           | 88.66           | 73.77                                                                                                                         | 67.80 | 72.16           | 75.37           |
| <b>Levofloxacin</b>      | 12.04                                                                                                               | 36.80  | 11.17           | 12.91           | 0.99                                                                                                                           | 3.76  | 0.90            | 1.08            | 0.86                                                                                                                          | 3.34  | 0.78            | 0.94            |
| <b>Moxifloxacin</b>      | 4.37                                                                                                                | 12.56  | 4.07            | 4.67            | 0.39                                                                                                                           | 1.62  | 0.35            | 0.43            | 0.34                                                                                                                          | 1.43  | 0.30            | 0.37            |
| <b>Ofloxacin</b>         | 8.98                                                                                                                | 15.97  | 8.60            | 9.36            | 0.59                                                                                                                           | 1.57  | 0.56            | 0.63            | 0.59                                                                                                                          | 1.56  | 0.55            | 0.62            |
| <b>Total Antibiotics</b> | 1020.23                                                                                                             | 816.70 | 1000.88         | 10395.8         | 99.55                                                                                                                          | 88.18 | 97.46           | 101.64          | 84.97                                                                                                                         | 74.36 | 83.21           | 86.73           |

Abbreviations: CI = Confidence Interval, SD = standard deviation

<sup>1</sup> Number of GP practices included in study as the denominator

**Supplementary Table 7. Characteristics of patients with *E. coli* community-onset *E. coli* bacteraemia between 2013-2018 for isolates with complete GP practice codes**

|                                                         |                               | Total<br>(138,576) |       | Susceptible <sup>3</sup> isolates<br>(83,940) |       | Resistant <sup>3</sup> isolates<br>(54,636) |       |
|---------------------------------------------------------|-------------------------------|--------------------|-------|-----------------------------------------------|-------|---------------------------------------------|-------|
|                                                         |                               | n                  | %     | n                                             | %     | n                                           | %     |
| <b>Gender<sup>1</sup></b>                               | <b>Male</b>                   | 64,129             | 46.30 | 37,712                                        | 58.81 | 26,412                                      | 41.19 |
|                                                         | <b>Female</b>                 | 74,408             | 53.71 | 46,199                                        | 62.09 | 28,209                                      | 37.91 |
| <b>Patient age groups<br/>(in years)</b>                | <b>0 – 14</b>                 | 2219               | 1.60  | 1577                                          | 71.07 | 642                                         | 28.93 |
|                                                         | <b>15 – 24</b>                | 2641               | 1.90  | 1888                                          | 71.49 | 753                                         | 28.51 |
|                                                         | <b>25 – 64</b>                | 33,185             | 23.95 | 20,933                                        | 63.08 | 12,252                                      | 36.92 |
|                                                         | <b>65+</b>                    | 100,531            | 72.55 | 58,542                                        | 58.23 | 40,989                                      | 40.77 |
| <b>Region</b>                                           | <b>London</b>                 | 18,804             | 13.57 | 11,449                                        | 60.89 | 7355                                        | 39.11 |
|                                                         | <b>Southeast</b>              | 21,590             | 15.58 | 13,191                                        | 61.10 | 8399                                        | 38.90 |
|                                                         | <b>Southwest</b>              | 14,136             | 10.20 | 8716                                          | 61.66 | 5420                                        | 38.34 |
|                                                         | <b>West Midlands</b>          | 16,013             | 11.56 | 10,567                                        | 65.99 | 5446                                        | 34.01 |
|                                                         | <b>East Midlands</b>          | 12,057             | 8.70  | 6604                                          | 54.77 | 5453                                        | 45.23 |
|                                                         | <b>East of England</b>        | 15,596             | 11.25 | 8226                                          | 52.74 | 7370                                        | 47.26 |
|                                                         | <b>Northeast</b>              | 9068               | 6.54  | 6122                                          | 67.51 | 2946                                        | 32.49 |
|                                                         | <b>Yorkshire &amp; Humber</b> | 12,748             | 9.20  | 8208                                          | 64.39 | 4540                                        | 35.61 |
|                                                         | <b>Northwest</b>              | 18,564             | 13.40 | 10,857                                        | 58.48 | 7707                                        | 41.52 |
| <b>Tests against individual antibiotics<sup>2</sup></b> | <b>Ciprofloxacin</b>          | 118,943            | 85.83 | 98,407                                        | 82.73 | 20,536                                      | 17.27 |
|                                                         | <b>Co-Amoxiclav</b>           | 118,988            | 85.86 | 71,873                                        | 60.40 | 47,115                                      | 39.60 |
|                                                         | <b>Levofloxacin</b>           | 9385               | 6.77  | 7634                                          | 81.34 | 1751                                        | 18.66 |
|                                                         | <b>Moxifloxacin</b>           | 2912               | 2.10  | 1392                                          | 47.80 | 620                                         | 21.29 |
|                                                         | <b>Ofloxacin</b>              | 1612               | 1.16  | 10                                            | 0.62  | 102                                         | 6.33  |

<sup>1</sup>Data were missing for 39 isolates

<sup>2</sup>Not all isolates were tested against each antibiotic during AST

<sup>3</sup>Against at least one of five broad spectrum antibiotics tested

**Do Antibiotic Stewardship Interventions in Primary Care Have an Effect on Antimicrobial Resistance of Escherichia coli Bacteraemia in England? An Ecological Analysis of National Data Between 2013-2018**

**STROBE Statement**

Checklist of items that should be included in reports of cross-sectional studies:

|                           | <b>Item No</b> | <b>Recommendation</b>                                                                                                                                                                               | <b>Page No</b> |
|---------------------------|----------------|-----------------------------------------------------------------------------------------------------------------------------------------------------------------------------------------------------|----------------|
| <b>Title and abstract</b> | 1              | (a) Indicate the study's design with a commonly used term in the title or the abstract                                                                                                              | 1              |
|                           |                | (b) Provide in the abstract an informative and balanced summary of what was done and what was found                                                                                                 | 4              |
| <b>Introduction</b>       |                |                                                                                                                                                                                                     |                |
| Background/rationale      | 2              | Explain the scientific background and rationale for the investigation being reported                                                                                                                | 5              |
| Objectives                | 3              | State specific objectives, including any prespecified hypotheses                                                                                                                                    | 5              |
| <b>Methods</b>            |                |                                                                                                                                                                                                     |                |
| Study design              | 4              | Present key elements of study design early in the paper                                                                                                                                             | 6              |
| Setting                   | 5              | Describe the setting, locations, and relevant dates, including periods of recruitment, exposure, follow-up, and data collection                                                                     | 6              |
| Participants              | 6              | (a) Give the eligibility criteria, and the sources and methods of selection of participants                                                                                                         | 6              |
| Variables                 | 7              | Clearly define all outcomes, exposures, predictors, potential confounders, and effect modifiers. Give diagnostic criteria, if applicable                                                            | 7 and 9        |
| Data sources/measurement  | 8*             | For each variable of interest, give sources of data and details of methods of assessment (measurement). Describe comparability of assessment methods if there is more than one group                | 6 and 7        |
| Bias                      | 9              | Describe any efforts to address potential sources of bias                                                                                                                                           | 7 and 10a      |
| Study size                | 10             | Explain how the study size was arrived at                                                                                                                                                           | 6 and 8        |
| Quantitative variables    | 11             | Explain how quantitative variables were handled in the analyses. If applicable, describe which groupings were chosen and why                                                                        | 6,7 and 9      |
| Statistical methods       | 12             | (a) Describe all statistical methods, including those used to control for confounding                                                                                                               | 9              |
|                           |                | (b) Describe any methods used to examine subgroups and interactions                                                                                                                                 | NA             |
|                           |                | (c) Explain how missing data were addressed                                                                                                                                                         | 9              |
|                           |                | (d) If applicable, describe analytical methods taking account of sampling strategy                                                                                                                  | NA             |
|                           |                | (e) Describe any sensitivity analyses                                                                                                                                                               | 9              |
| <b>Results</b>            |                |                                                                                                                                                                                                     |                |
| Participants              | 13*            | (a) Report numbers of individuals at each stage of study—e.g. numbers potentially eligible, examined for eligibility, confirmed eligible, included in the study, completing follow-up, and analysed | 8              |
|                           |                | (b) Give reasons for non-participation at each stage                                                                                                                                                | 8              |
|                           |                | (c) Consider use of a flow diagram                                                                                                                                                                  | 8              |
| Descriptive data          | 14*            | (a) Give characteristics of study participants (e.g. demographic, clinical, social) and information on exposures and potential confounders                                                          | 6 and 11       |
|                           |                | (b) Indicate number of participants with missing data for each variable of interest                                                                                                                 | 6, 8 and 11    |
| Outcome data              | 15*            | Report numbers of outcome events or summary measures                                                                                                                                                | 6 and 11       |

|                          |    |                                                                                                                                                                                                                |                   |
|--------------------------|----|----------------------------------------------------------------------------------------------------------------------------------------------------------------------------------------------------------------|-------------------|
| Main results             | 16 | (a) Give unadjusted estimates and, if applicable, confounder-adjusted estimates and their precision (e.g., 95% confidence interval). Make clear which confounders were adjusted for and why they were included | 11, 12, 15 and 16 |
|                          |    | (b) Report category boundaries when continuous variables were categorized                                                                                                                                      | NA                |
|                          |    | (c) If relevant, consider translating estimates of relative risk into absolute risk for a meaningful time period                                                                                               | NA                |
| Other analyses           | 17 | Report other analyses done—e.g. analyses of subgroups and interactions, and sensitivity analyses                                                                                                               | 11 and 16         |
| <b>Discussion</b>        |    |                                                                                                                                                                                                                |                   |
| Key results              | 18 | Summarise key results with reference to study objectives                                                                                                                                                       | 17                |
| Limitations              | 19 | Discuss limitations of the study, taking into account sources of potential bias or imprecision. Discuss both direction and magnitude of any potential bias                                                     | 17                |
| Interpretation           | 20 | Give a cautious overall interpretation of results considering objectives, limitations, multiplicity of analyses, results from similar studies, and other relevant evidence                                     | 18                |
| Generalisability         | 21 | Discuss the generalisability (external validity) of the study results                                                                                                                                          | 18                |
| <b>Other information</b> |    |                                                                                                                                                                                                                |                   |
| Funding                  | 22 | Give the source of funding and the role of the funders for the present study and, if applicable, for the original study on which the present article is based                                                  | 4, 11 and 20      |
